# Supplementary material for: Effect of Viral Abundance and Diversity Associated with Mycoplasma hyopneumoniae on the Severity of Lung Lesions in Slaughtered Pigs: A Case-Control Study
Source: Research Square preprint supplement (doi:10.21203/rs.3.rs-8426575/v1), 2026-01-21
Supplement: Supplementary file 1 [file a7f78071d12b6e4f8d668f1b.pdf]

## Supplementary Material

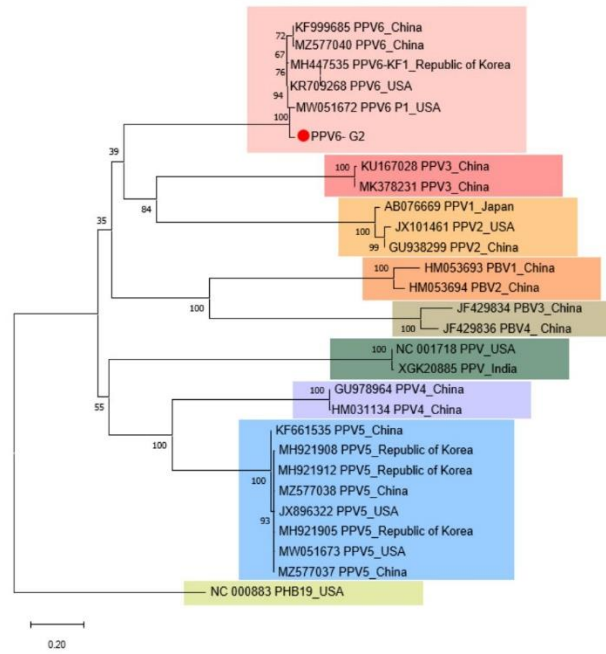

**Figure S1:** Genetic characterization of PPV. Phylogenetic analysis of the complete PPV6 genome, identified in Group 2, inferred with the maximum likelihood method, Kimura-2 model parameter. All analyses were performed with 1000 bootstrap replicates. The sequence obtained in this study is indicated by the red dot. (GenBank access: PX092311).

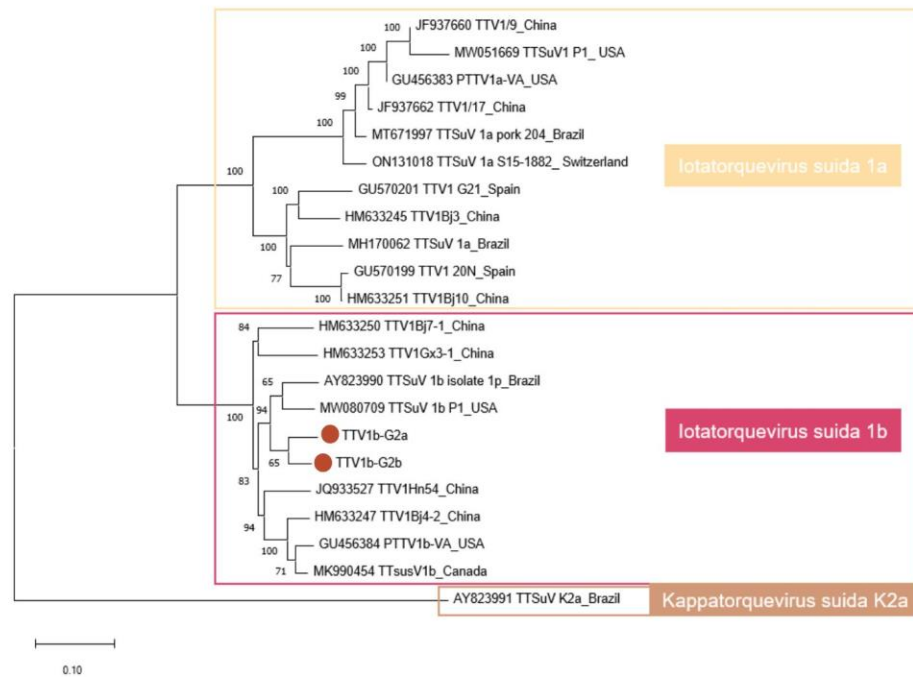

**Figure S2:** Phylogenetic analysis of the complete TTSuV genome was inferred using the maximum likelihood method, Tamura-3 model parameter. All analyses were performed with 1000 bootstrap replicates. The TTV1b\_G2a and TTV1b\_G2b sequences are grouped into the Iotatorquevirus suida1b cluster. The sequences obtained in this study are indicated by the red dots (GenBank access: PX092309; PX092310).

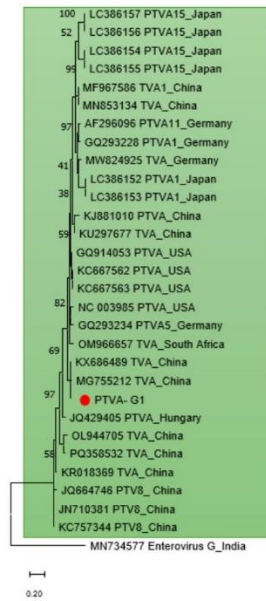

**Figure S3:** Phylogenetic analysis of PTV, found in Group 1, was inferred using the maximum likelihood method, Kimura-2 model parameter. All analyses were performed with 1000 bootstrap replicates. The sequence obtained in this study is indicated by the red dot (b) (GenBank access: PX101488).
